# Supplementary material
Source: ML conference proceedings conference paper supplement (https://openreview.net/forum?id=mrsx7ninrtU)

Target 50, Context 450

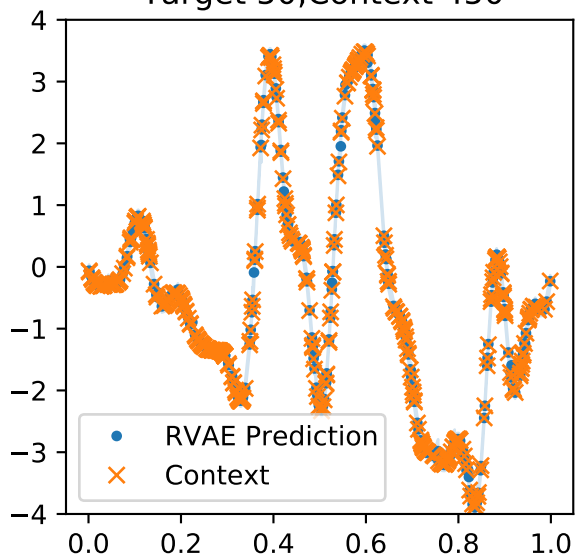

Target 350, Context 150

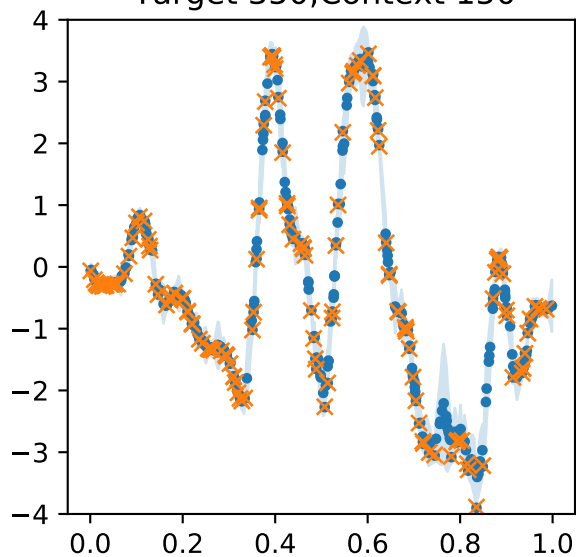

Target 490, Context 10

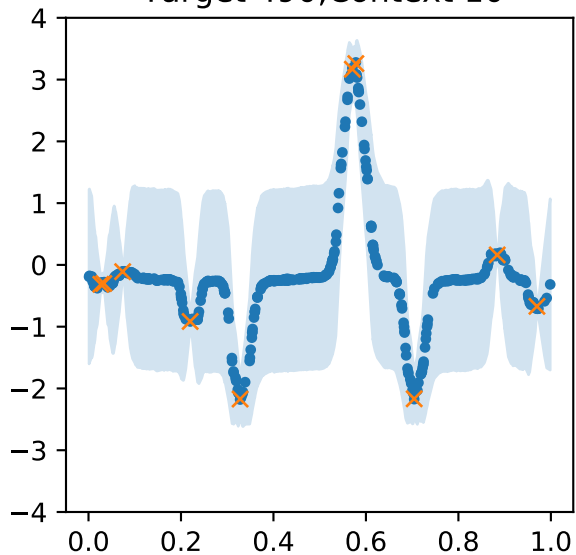

Target 495, Context 5

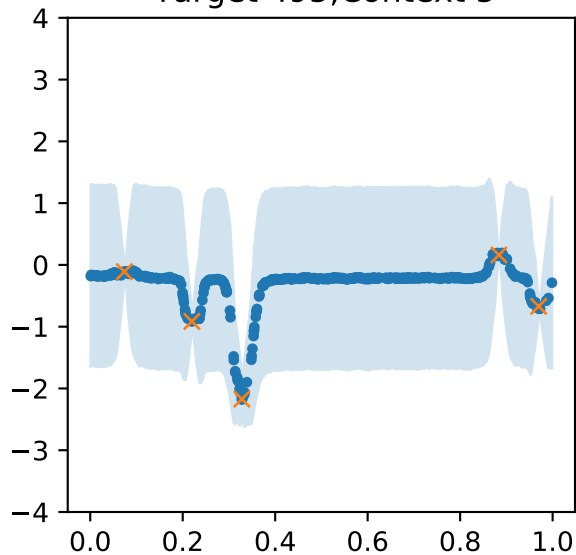

Supplement: supplementary_material [file attachment]
